# Supplementary material for: Synthesis of metal-fluoride nanoparticles supported on thermally reduced graphite oxide
Source: publisher site journal article supplement (doi:10.3762/bjnano.8.247), 2017-11-22
Supplement: Additional file 1 [file 2190-4286-8-247-S1.pdf]

# Supporting Information

for

## **Synthesis of metal-fluoride nanoparticles supported on thermally reduced graphite oxide**

Alexa Schmitz<sup>1</sup>, Kai Schütte<sup>1</sup>, Vesko Ilievski<sup>1</sup>, Juri Barthel<sup>2</sup>, Laura Burk<sup>3</sup>, Rolf Mülhaupt<sup>3</sup>, Junpei Yue<sup>4</sup>, Bernd Smarsly<sup>4</sup> and Christoph Janiak<sup>\*,§,1</sup>

Address: <sup>1</sup>Institut für Anorganische Chemie und Strukturchemie, Heinrich-Heine-Universität Düsseldorf, 40204 Düsseldorf, Germany; <sup>2</sup>Gemeinschaftslabor für Elektronenmikroskopie RWTH-Aachen, Ernst Ruska-Centrum für Mikroskopie und Spektroskopie mit Elektronen, D-52425 Jülich, Germany; <sup>3</sup>Freiburg Materials Research Center and Institute for Macromolecular Chemistry, Albert-Ludwigs-University Freiburg, 79104 Freiburg, Germany and <sup>4</sup>Physikalisch-Chemisches Institut, Justus-Liebig-Universität Gießen, 35392 Gießen, Germany

Email: Christoph Janiak\* - [janiak@uni-duesseldorf.de](mailto:janiak@uni-duesseldorf.de)

\* Corresponding author

§Fax: +49-211-81-12287; Tel: +49-211-81-12286

## **Additional experimental data**

## Synthesis of TRGO and TRGO-SH

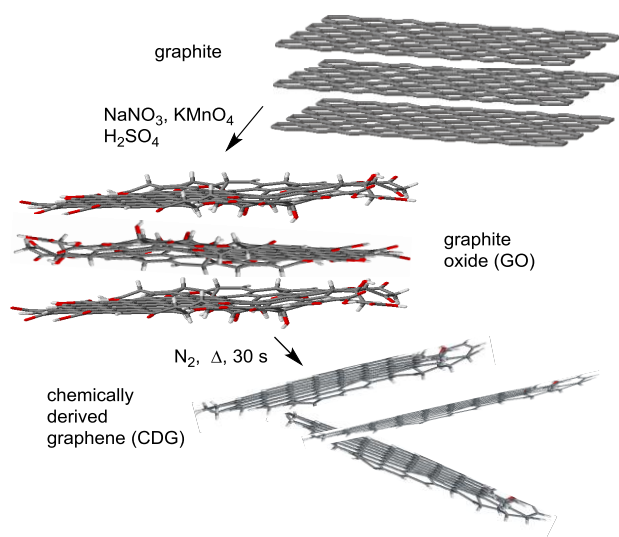

**Scheme S1:** Synthesis of chemically derived graphene (CDG)/ thermally reduced graphene oxide (TRGO) from natural graphite over graphite oxide (adapted from [1]).

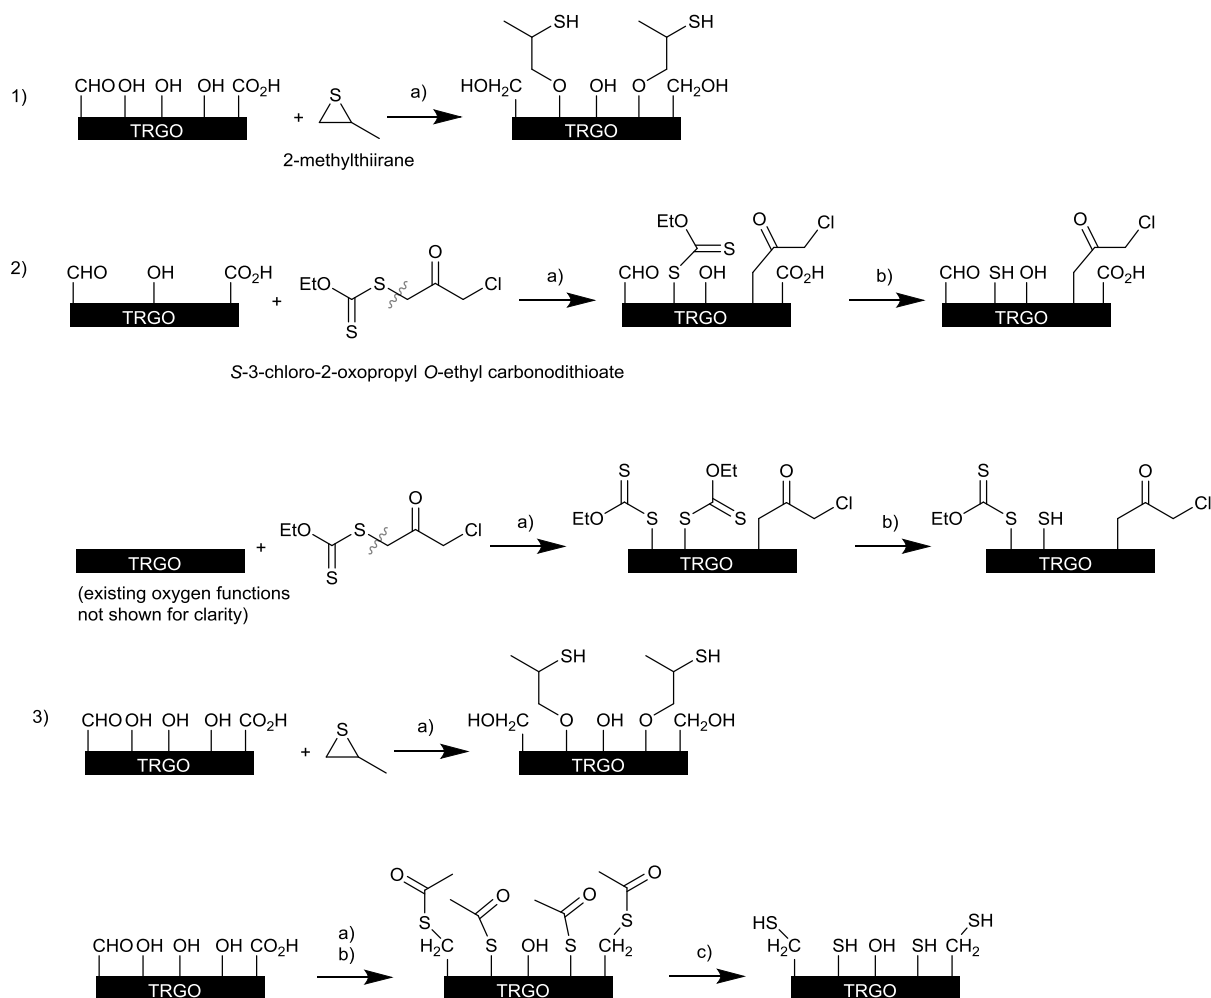

**Scheme S2:** Synthesis of TRGO-SH. Three different routes for the synthesis of TRGO-SH from TRGO-400 (adapted from [2]).

# Analysis of TRGO-300, -400, -750 and -SH

## TRGO-300

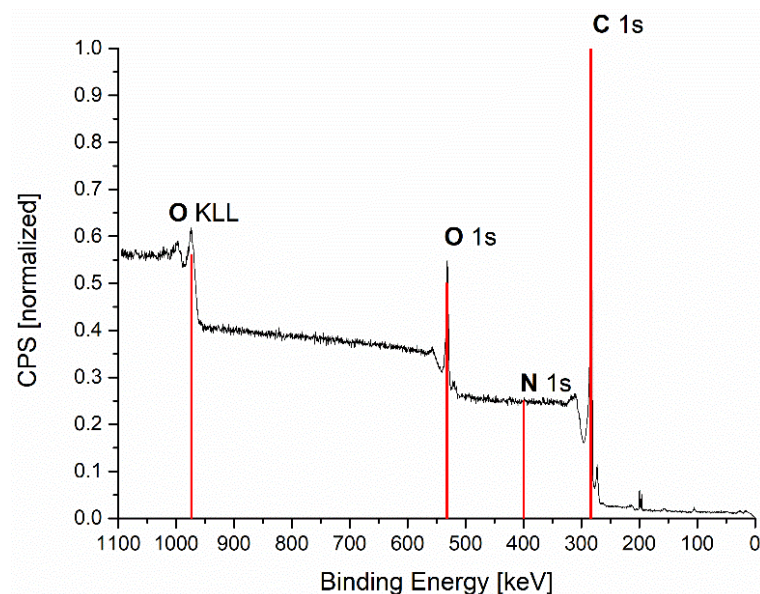

**Figure S1:** Photoelectron spectrum of TRGO-300. The red bars are a guide to the eye on the binding energy axis.

**Table S1:** XPS quantification of TRGO-300.

| name | position | area   | atom % | R.S.F. |
|------|----------|--------|--------|--------|
| O 1s | 532      | 111030 | 14     | 2.93   |
| C 1s | 283      | 223791 | 86     | 1      |

In the XP spectra a clear oxygen and carbon signal was seen. Quantification of oxygen against carbon showed that TRGO-300 contains 14 atom % oxygen.

**Table S2:** CHN analysis of TRGO-300.

| Sample   | C [wt %] | H [wt %] | S [wt %] |
|----------|----------|----------|----------|
| TRGO-300 | 79.86    | 0.77     | 0.55     |

The sulfur impurity is believed to be derived from graphite.

The BET surface of TRGO-300 was 430 m<sup>2</sup>/g.

## TRGO-400

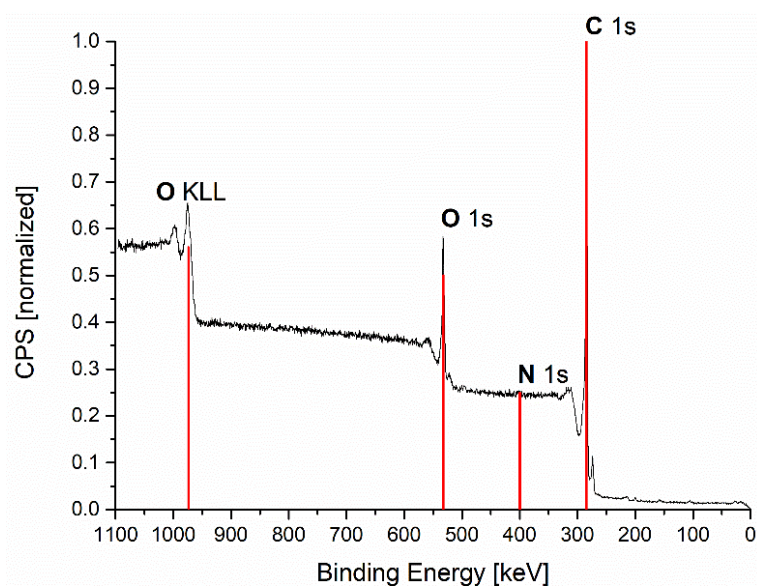

**Figure S2:** Photoelectron spectrum of TRGO-400. The red bars are a guide to the eye on the binding energy axis.

**Table S3:** XPS quantification of TRGO-400.

| name | position | area   | atom % | R.S.F. |
|------|----------|--------|--------|--------|
| O 1s | 533      | 127192 | 15     | 2.93   |
| C 1s | 284      | 248465 | 85     | 1      |

In the XP spectra a clear oxygen and carbon signal was seen. Quantification of oxygen against carbon showed that TRGO-300 contains 15 atom % oxygen.

**Table S4:** CHN analysis of TRGO-400.

| sample   | C [wt %] | H [wt %] | S [wt %] |
|----------|----------|----------|----------|
| TRGO-400 | 80.93    | 0.8      | 0.73     |

The S impurity is believed to be derived from graphite.

The BET surface of TRGO-400 was 450 m<sup>2</sup>/g.

## TRGO-750

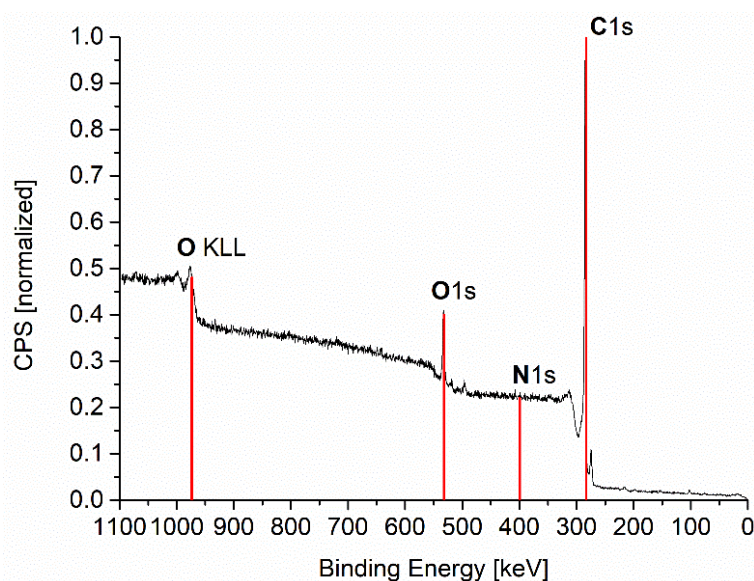

**Figure S3:** Photoelectron spectrum of TRGO-400. The red bars are a guide to the eye on the binding energy axis.

**Table S5:** XPS quantification of TRGO-750.

| name | position | area   | atom % | R.S.F. |
|------|----------|--------|--------|--------|
| O 1s | 533      | 41954  | 9      | 2.93   |
| C 1s | 284      | 150049 | 91     | 1      |

In the XP spectra a clear oxygen and carbon signal was seen. Quantification of oxygen against carbon showed that TRGO-300 contains 9 atom % oxygen.

**Table S6:** CHN analysis of TRGO-750.

| sample   | C [wt %] | H [wt %] |
|----------|----------|----------|
| TRGO-750 | 82.39    | 0.81     |

The BET surface of TRGO-750 was 520 m<sup>2</sup>/g.

## TRGO-SH

**Table S7:** CHN analysis of TRGO-SH.

| sample  | C [wt %] | H [wt %] | S [wt %] |
|---------|----------|----------|----------|
| TRGO-SH | 54.77    | 1.48     | 0.96     |

The BET surface of TRGO-SH was 189 m<sup>2</sup>/g.

# Overview of all samples

MF<sub>x</sub>@TRGO-300:

FeF<sub>2</sub>@TRGO-300

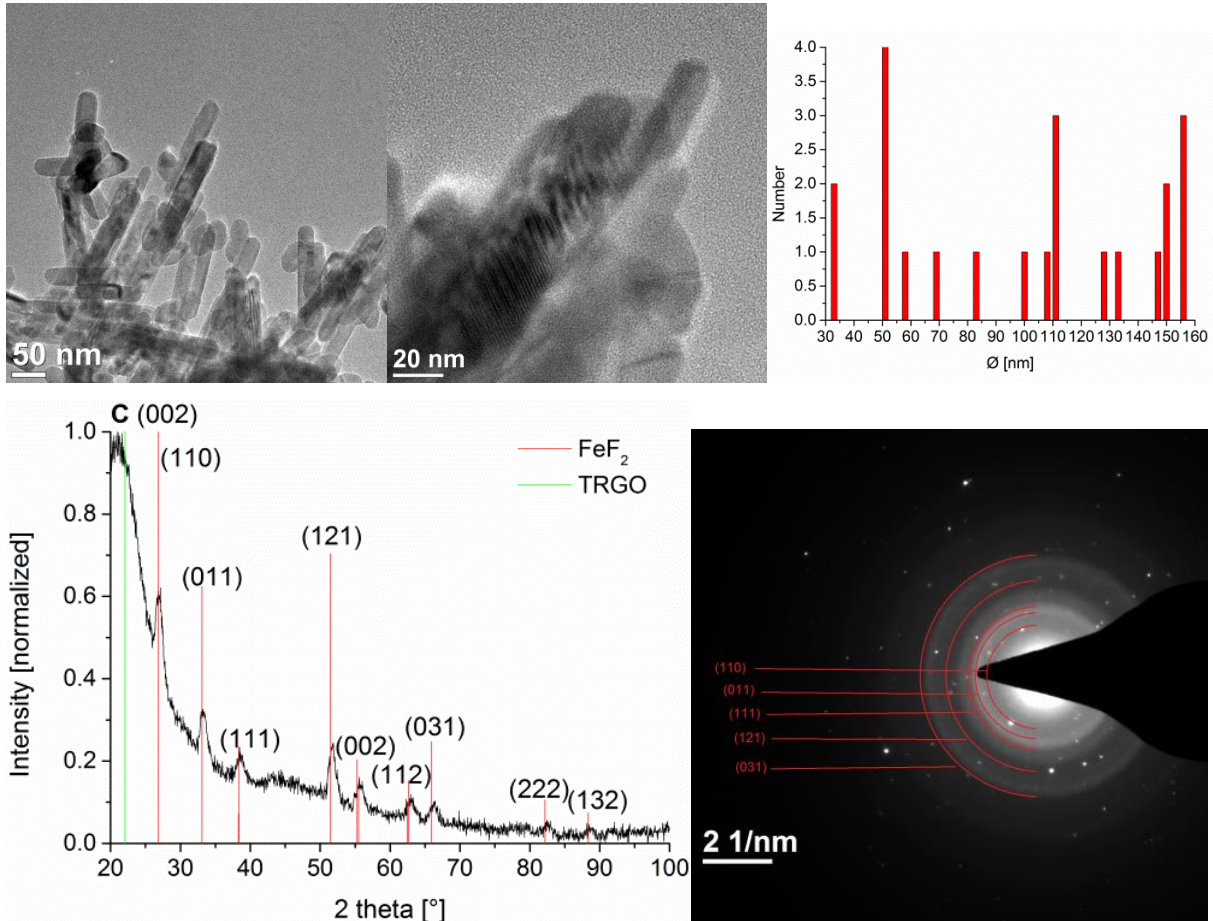

**Figure S4:** TEM and size distribution (top), PXRD and SAED (bottom, FeF<sub>2</sub>-reference reflections in red from COD 9009074) of 0.5 wt % FeF<sub>2</sub>-NPs in [BMIm][BF<sub>4</sub>]@TRGO-300 from Fe(AMD)<sub>2</sub>.



### CoF<sub>2</sub>@TRGO-300

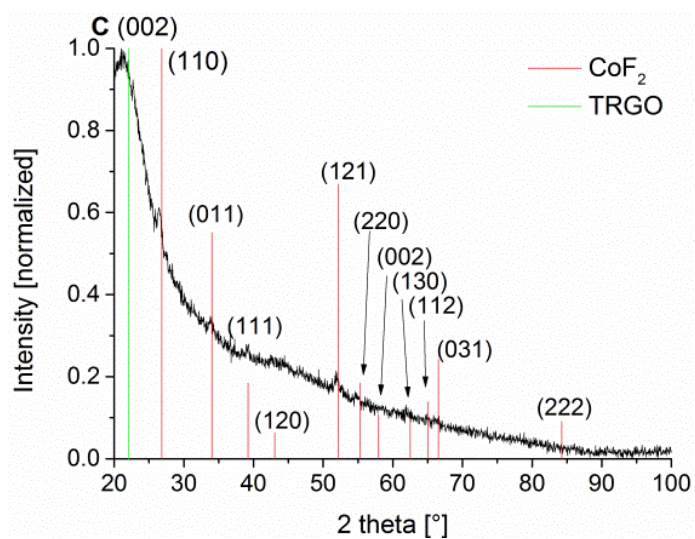

**Figure S5:** PXRD (CoF<sub>2</sub> – reference reflections in red from COD 9009073) of 0.5 wt % CoF<sub>2</sub>-NPs in [BMIm][BF<sub>4</sub>] @TRGO-300 from Co(AMD)<sub>2</sub>.

### PrF<sub>3</sub>@TRGO-300

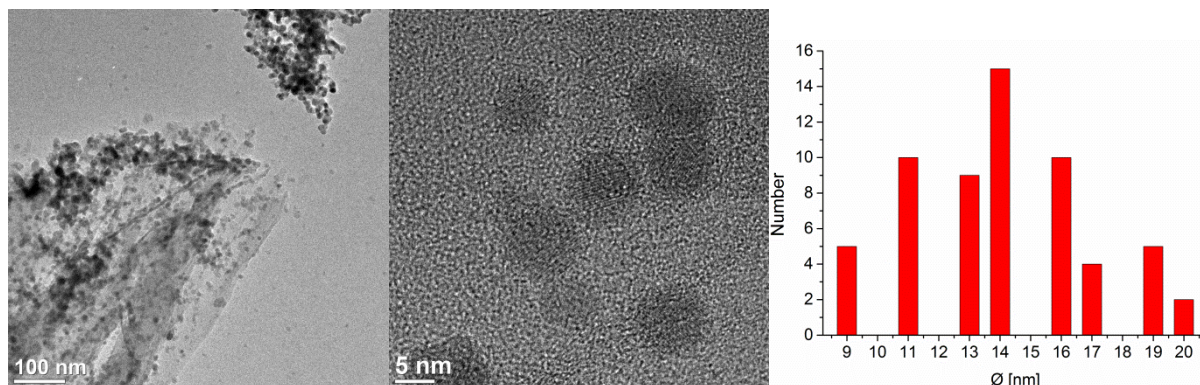



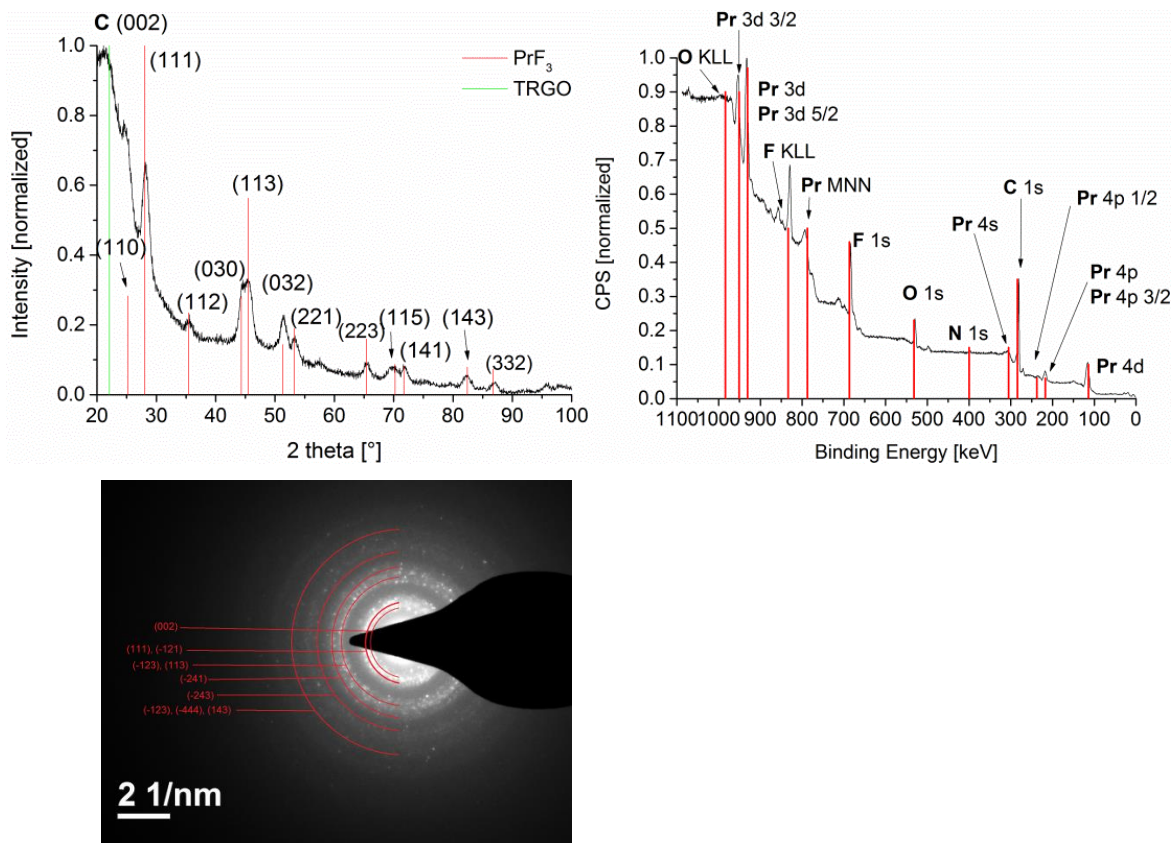

**Figure S6:** TEM and size distribution (top), PXRD and XPS (middle,  $\text{PrF}_3$ - reference reflections in red from COD 1010984) and SAED (bottom) of 0.5 wt %  $\text{PrF}_3$ -NPs in  $[\text{BMIm}][\text{BF}_4]$  @TRGO-300 from  $\text{Pr}(\text{AMD})_3$ . XPS: The red bars are a guide to the eye on the binding energy axis.

### $\text{EuF}_3$ @TRGO-300

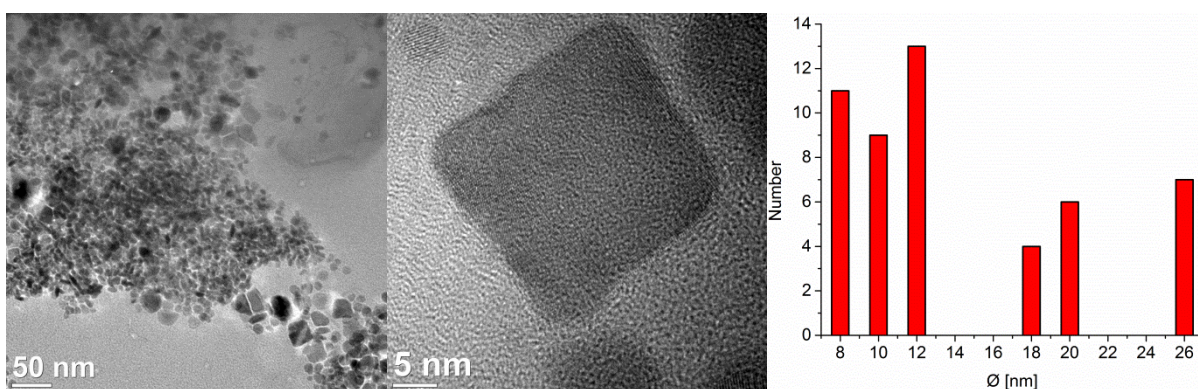

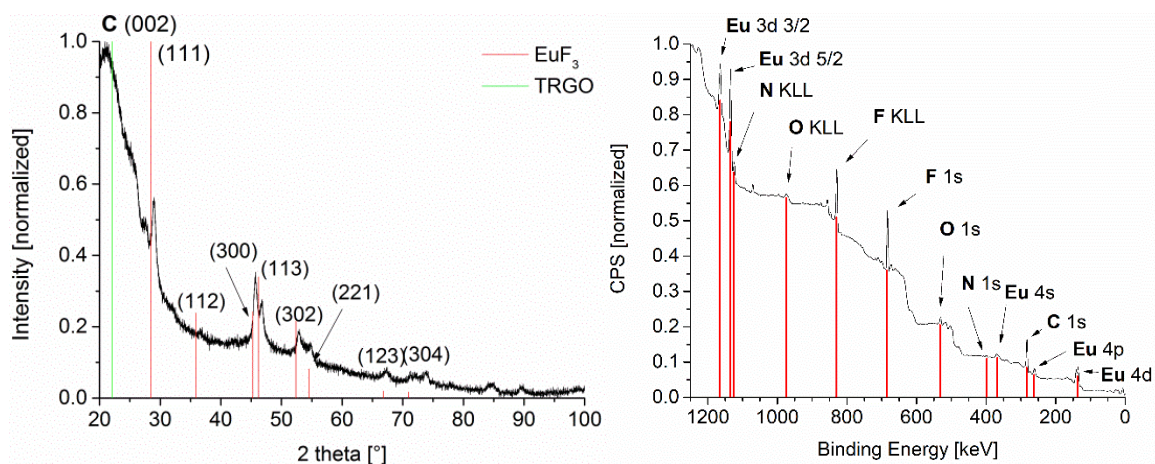

**Figure S7:** TEM and size distribution (top), PXRD and XPS (bottom,  $\text{EuF}_3$ - reference reflections in red from ICDD 33–0373) of 0.5 wt %  $\text{EuF}_3$ -NPs in  $[\text{BMIm}][\text{BF}_4]$  @TRGO–300 from  $\text{Eu}(\text{dpm})_3$ . XPS: The red bars are a guide to the eye on the binding energy axis.

**Table S8:**  $d$ -spacing references for  $\text{FeF}_2$  and  $\text{PrF}_3$  from the literature compared with the measured  $d$ -spacing.

| $d$ -spacing reference (hkl)<br>[ $\text{FeF}_2$ COD: 9009074] | $d$ -spacing measured | $d$ -spacing reference (hkl)<br>[ $\text{PrF}_3$ COD: 1010984] | $d$ -spacing measured |
|----------------------------------------------------------------|-----------------------|----------------------------------------------------------------|-----------------------|
| 3.32 (110)                                                     | 3.30                  | 3.61 (002)                                                     | 3.63                  |
| 2.70 (011)                                                     | 2.71                  | 3.17 (111/–121)                                                | 3.14                  |
| 2.34 (111)                                                     | 2.38                  | 1.99 (–123/113)                                                | 1.99                  |
| 1.77 (121)                                                     | 1.78                  | 1.71 (–241)                                                    | 1.70                  |
| 1.41 (031)                                                     | 1.42                  | 1.42 (–243)                                                    | 1.44                  |
|                                                                |                       | 1.16 (–153/ –444/<br>143)                                      | 1.14                  |

**Table S9:** Comparison of XPS binding energies.

| MF <sub>x</sub> @TRGO-300 binding energies [keV] |          |                 |                             |
|--------------------------------------------------|----------|-----------------|-----------------------------|
| metal signals                                    |          |                 |                             |
| element                                          | measured | M(0) metal      | M(3+) oxidation state [3,4] |
| Pr 3d 5/2                                        | 934.6    | 932             | 933–933.5                   |
| Eu 3d 5/2                                        | 1135.8   | 1126            | 3: 1135                     |
| F 1s signal                                      |          |                 |                             |
|                                                  | measured | metal fluorides | organic fluorides [3,4]     |
| F (in PrF <sub>3</sub> )                         | 686      | 684–685.5       | 688–689                     |
| F (in EuF <sub>3</sub> )                         | 684.8    |                 |                             |



## TRGO-400:

### FeF<sub>2</sub>@TRGO-400

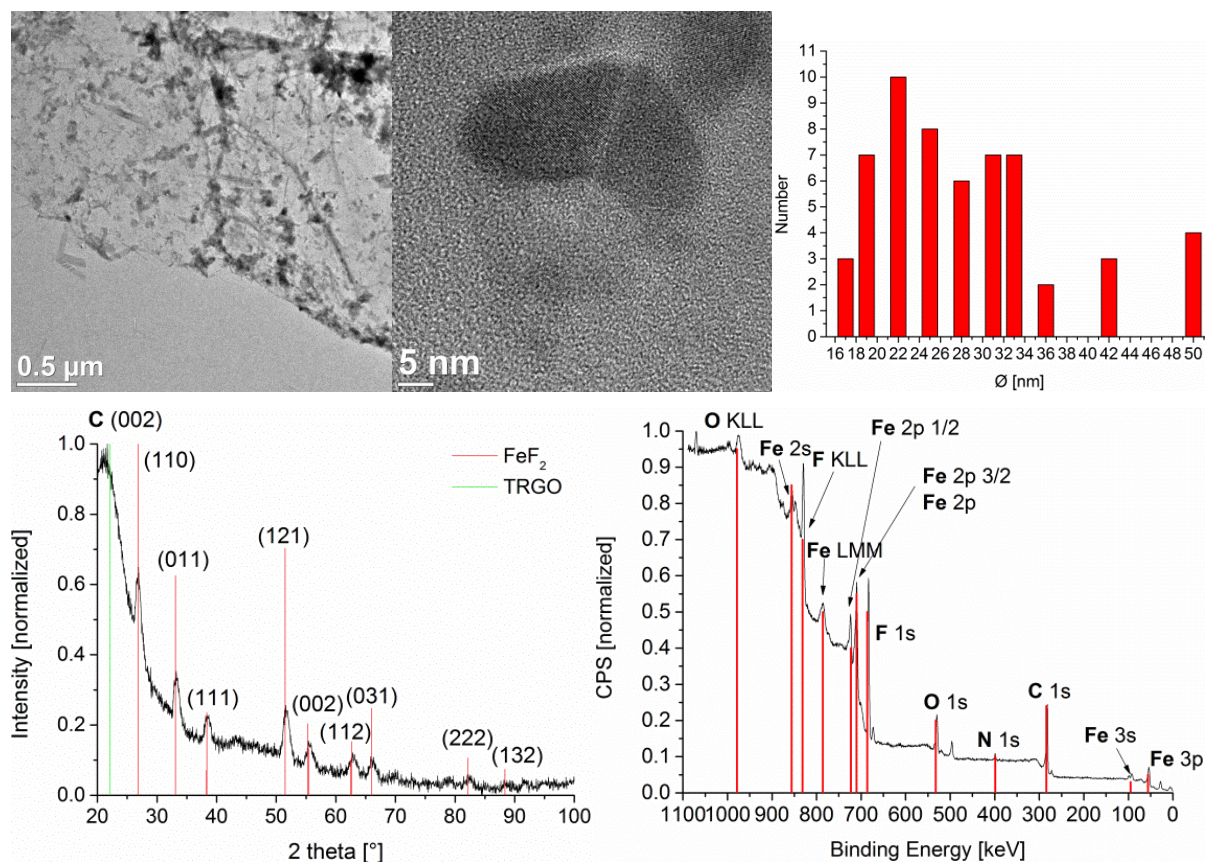

**Figure S8:** TEM and size distribution (top), PXRD and XPS (bottom, FeF<sub>2</sub>-reference reflections in red from COD 9009074) of 0.5 wt % FeF<sub>2</sub>-NPs in [BMIm][BF<sub>4</sub>]@TRGO-400 from Fe(AMD)<sub>2</sub>. XPS: The red bars are a guide to the eye on the binding energy axis.

### CoF<sub>2</sub>@TRGO-400

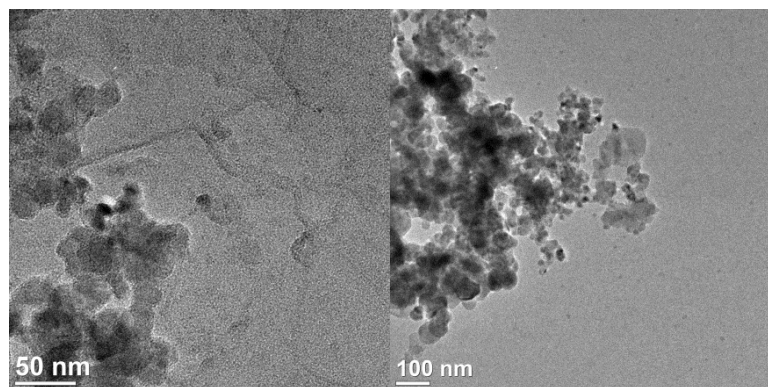

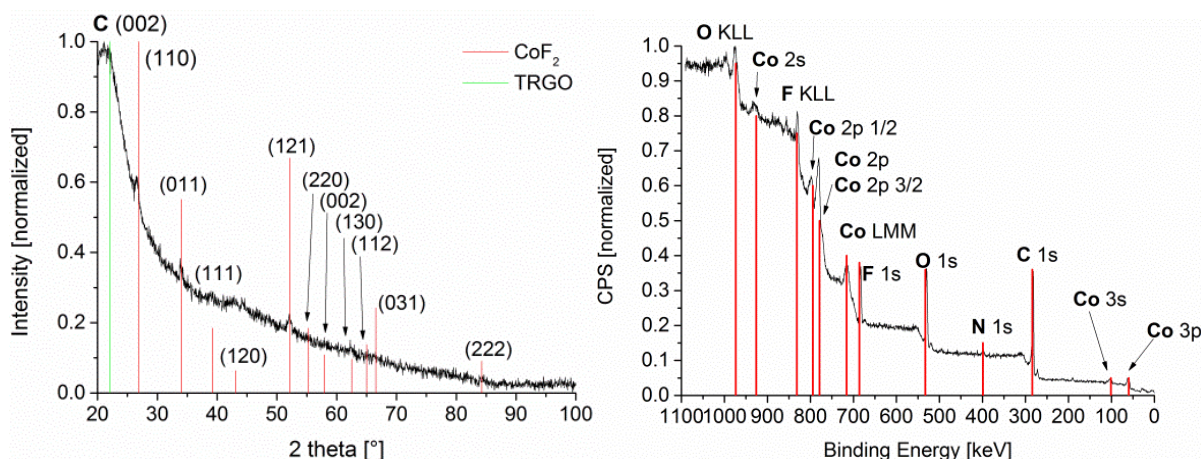

**Figure S9:** TEM and PXR D (top) CoF<sub>2</sub>- reference reflections in red from COD 9009073), XPS (bottom) of 0.5 wt % CoF<sub>2</sub>-NPs in [BMIm][BF<sub>4</sub>] @TRGO-400 from Co(AMD)<sub>2</sub>. XPS: The red bars are a guide to the eye on the binding energy axis.

### PrF<sub>3</sub>@TRGO-400

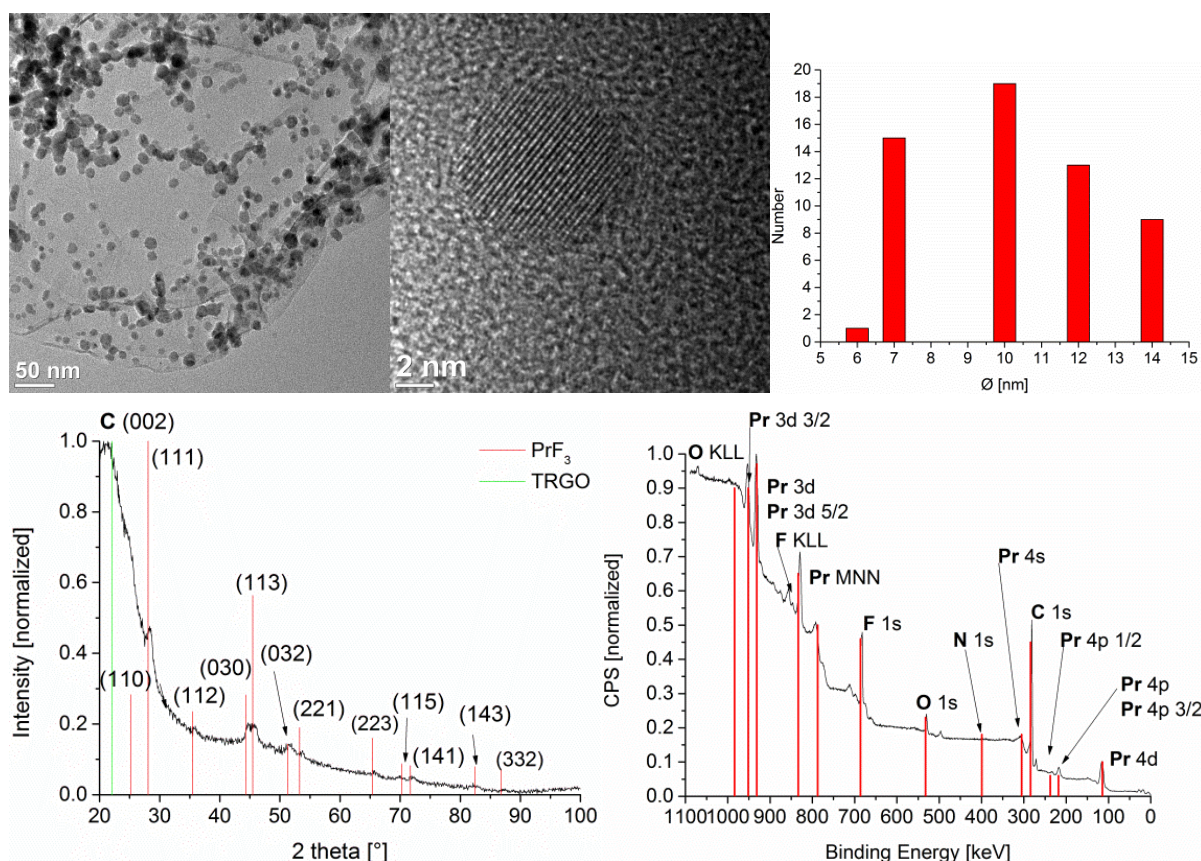

**Figure S10:** TEM and size distribution (top), PXR D and XPS (bottom, PrF<sub>3</sub>-reference reflections in red from COD 1010984) of 0.5 wt % PrF<sub>3</sub>-NPs in [BMIm][BF<sub>4</sub>] @TRGO-400 from Pr(AMD)<sub>3</sub>. XPS: The red bars are a guide to the eye on the binding energy axis.



## EuF<sub>3</sub>@TRGO-400

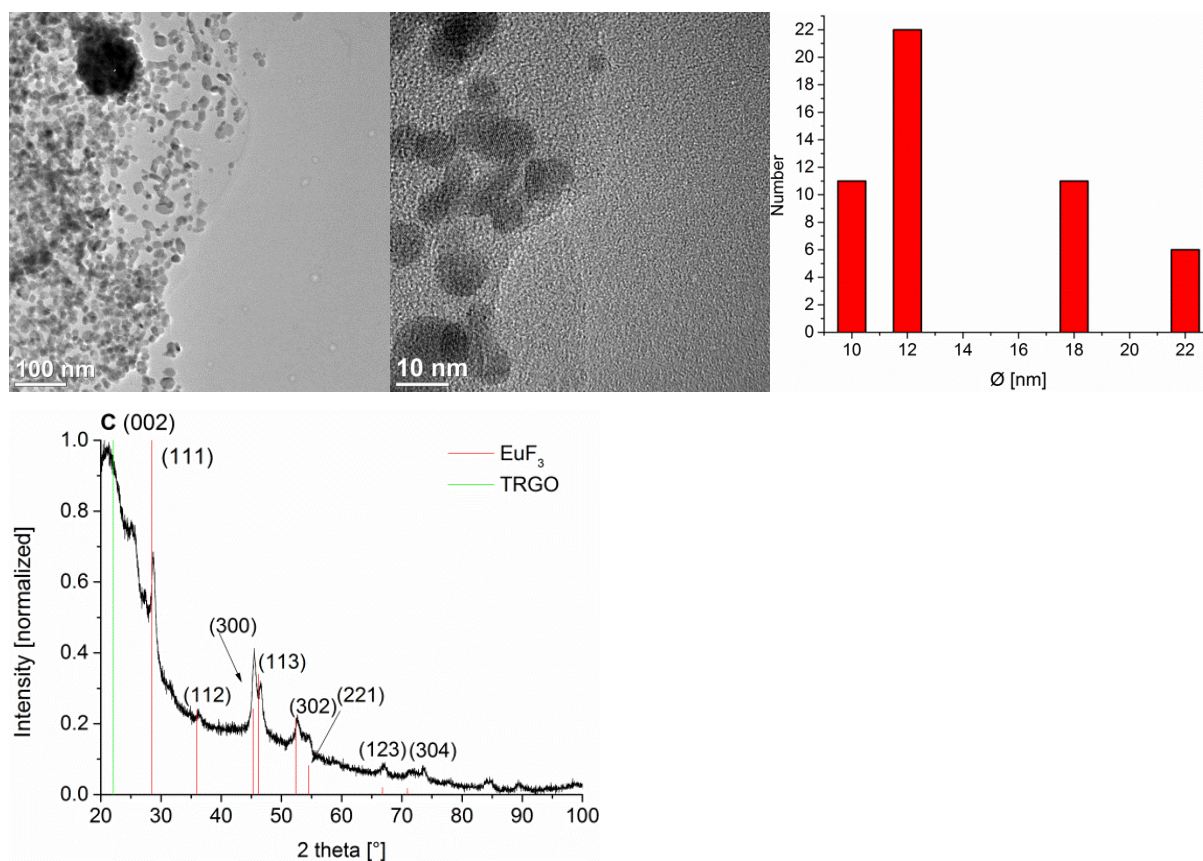

**Figure S11:** TEM and size distribution (top), PXRD (bottom, EuF<sub>3</sub>-reference reflections in red from ICDD 33-0373), of 0.5 wt % EuF<sub>3</sub>-NPs in [BMIm][BF<sub>4</sub>]@TRGO-400 from Eu(dpm)<sub>3</sub>.

**Table S10:** Comparison of the XPS binding energies.

| MF <sub>x</sub> @TRGO-400 binding energies [keV] |          |                 |                                |
|--------------------------------------------------|----------|-----------------|--------------------------------|
| metal signals                                    |          |                 |                                |
| element                                          | measured | M(0) metal      | M(+2/+3) oxidation state [3,4] |
| Fe 2p 3/2                                        | 712.5    | 706.7           | +2: 710.4                      |
| Co 2p 3/2                                        | 783      | 778.2           | +2: 779.7                      |
| Pr 3d 5/2                                        | 934.3    | 932             | +3: 933–933.5                  |
| F 1s signal                                      |          |                 |                                |
|                                                  | measured | metal fluorides | organic fluoride [3,4]         |
| F (in FeF <sub>2</sub> )                         | 685.6    | 684–685.5       | 688–689                        |
| F (in CoF <sub>2</sub> )                         | 685.9    |                 |                                |
| F (in PrF <sub>3</sub> )                         | 686.3    |                 |                                |



## TRGO-750:

### FeF<sub>2</sub>@TRGO-750

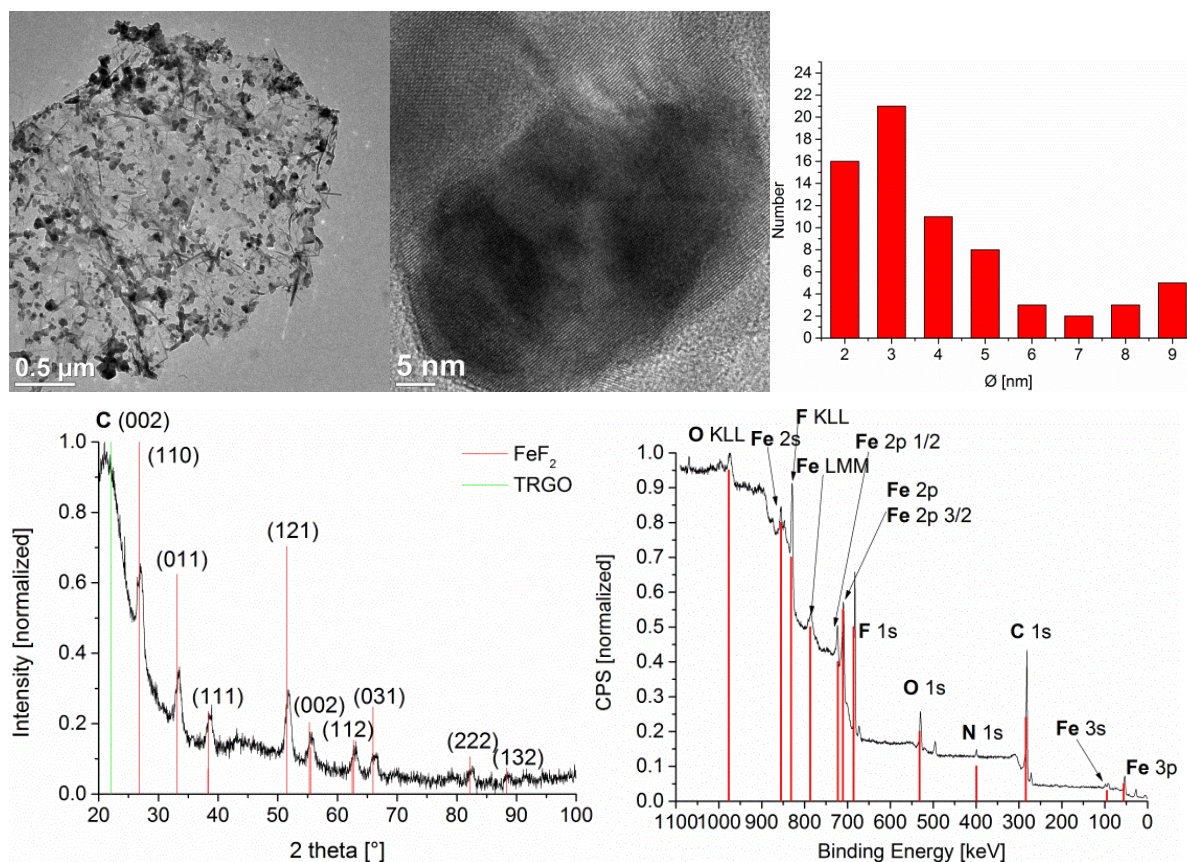

**Figure S12:** TEM and size distribution (top), PXRD and XPS (bottom, FeF<sub>2</sub>-reference reflections in red from COD 9009074) of 0.5 wt % FeF<sub>2</sub>-NPs in [BMIm][BF<sub>4</sub>]@TRGO-750 from Fe(AMD)<sub>2</sub>. XPS: The red bars are a guide to the eye on the binding energy axis.

### CoF<sub>2</sub>@TRGO-750

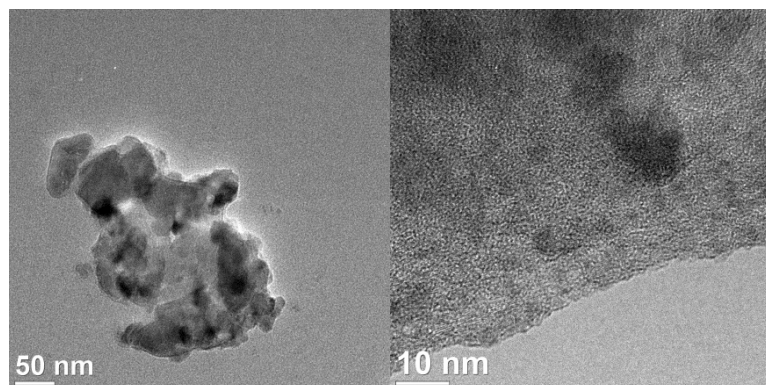

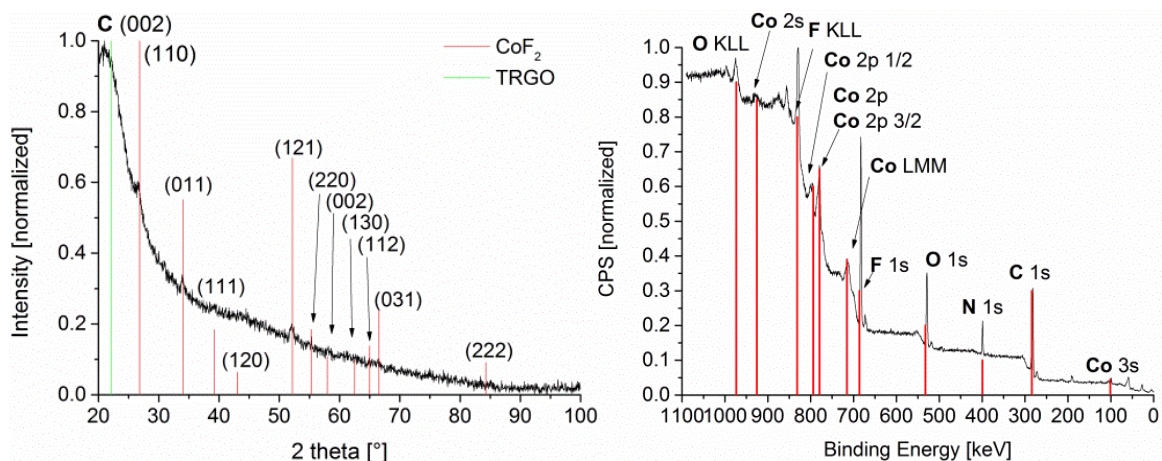

**Figure S13:** TEM and PXRD (top) CoF<sub>2</sub>-reference reflections in red from COD 9009073), XPS (bottom) of 0.5 wt % CoF<sub>2</sub>-NPs in [BMIm][BF<sub>4</sub>] @TRGO-750 from Co(AMD)<sub>2</sub>. XPS: The red bars are a guide to the eye on the binding energy axis.

### PrF<sub>3</sub>@TRGO-750

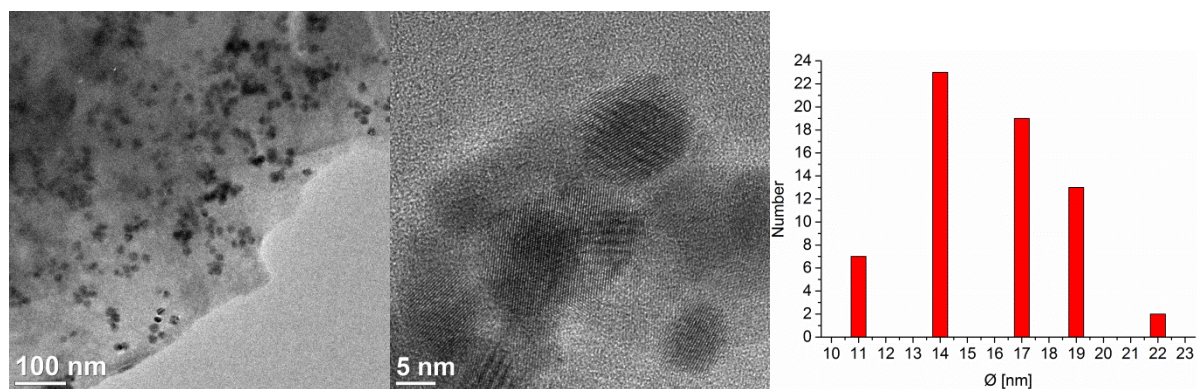



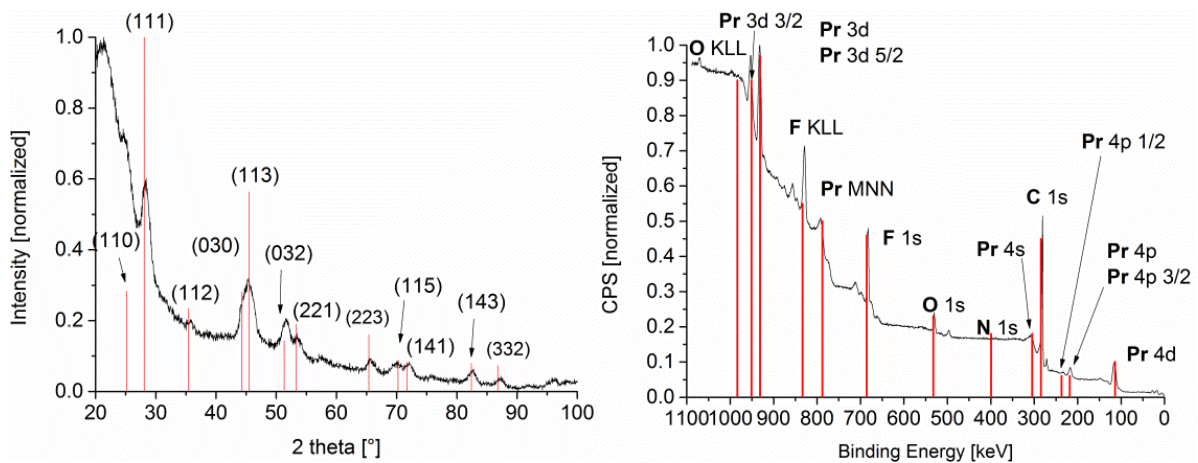

**Figure S14:** TEM and size distribution (top), PXRD and EDX (middle, PrF<sub>3</sub>-reference reflections in red from COD 1010984), XPS (bottom) of 0.5 wt % PrF<sub>3</sub>-NPs in [BMIm][BF<sub>4</sub>] @TRGO-750 from Pr(AMD)<sub>3</sub>. XPS: The red bars are a guide to the eye on the binding energy axis.

### EuF<sub>3</sub>@TRGO-750

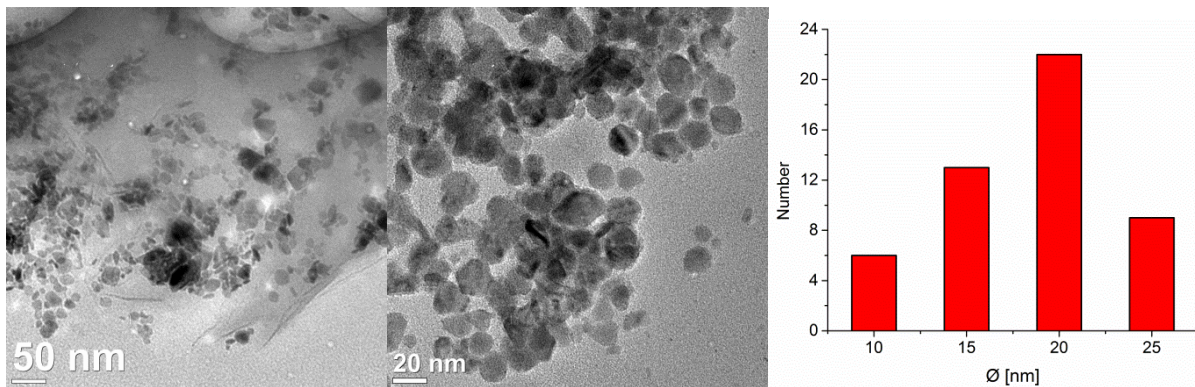

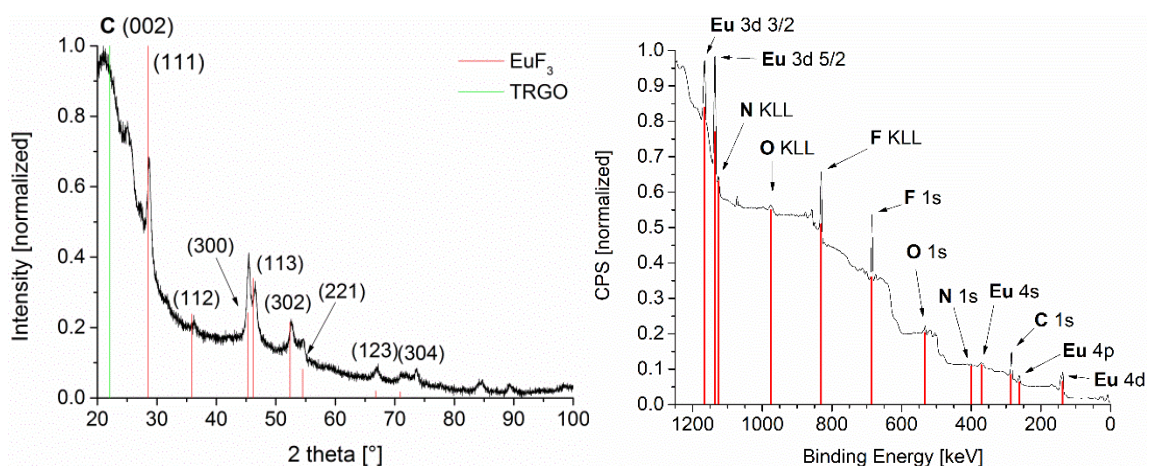

**Figure S15:** TEM and size distribution (top), PXRD and XPS (bottom, EuF<sub>3</sub>-reference reflections in red from ICDD 33–0373) of 0.5 wt % EuF<sub>3</sub>-NPs in [BMIm][BF<sub>4</sub>] @TRGO–750 from Eu(dpm)<sub>3</sub>. XPS: The red bars are a guide to the eye on the binding energy axis.

**Table S11:** Comparison of the XPS binding energies.

| MF <sub>x</sub> @TRGO–750 binding energies [keV] |          |                 |                                |
|--------------------------------------------------|----------|-----------------|--------------------------------|
| metal signals                                    |          |                 |                                |
| element                                          | measured | M(0) metal      | M(+2/+3) oxidation state [3,4] |
| Fe 2p 3/2                                        | 712.6    | 706.7           | +2: 710.4                      |
| Co 2p 3/2                                        | 781.7    | 778.2           | +2: 779.7                      |
| Pr 3d 5/2                                        | 935.5    | 932             | +3: 933–933.5                  |
| Eu 3d 5/2                                        | 1136.2   | 1126            | +3: 1135                       |
| F 1s signal                                      |          |                 |                                |
|                                                  | measured | metal fluorides | organic fluorides [3,4]        |
| F (in FeF <sub>2</sub> )                         | 685.5    | 684–685.5       | 688–689                        |
| F (in CoF <sub>2</sub> )                         | 685.2    |                 |                                |
| F (in PrF <sub>3</sub> )                         | 686      |                 |                                |
| F (in EuF <sub>3</sub> )                         | 685.5    |                 |                                |

## TRGO-SH:

### FeF<sub>2</sub>@TRGO-SH

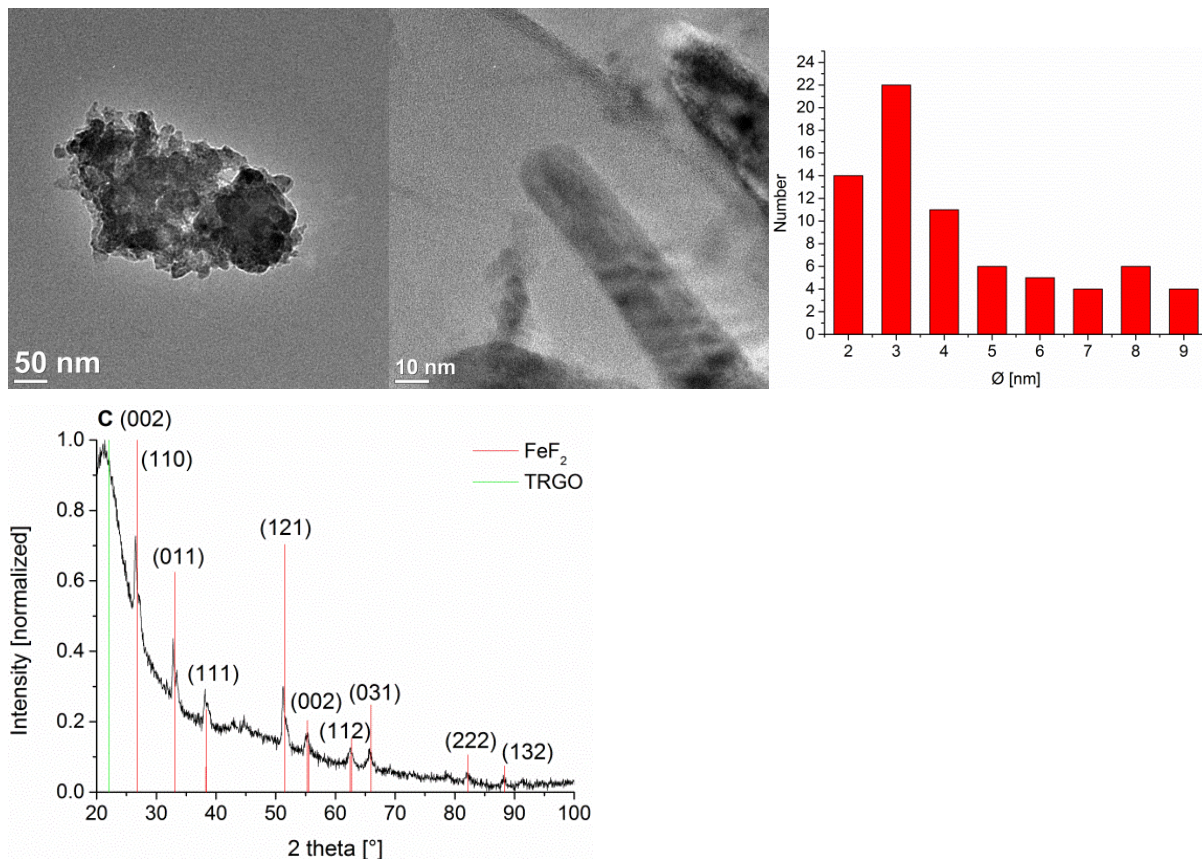

**Figure S16:** TEM and size distribution (top), PXRD (bottom, FeF<sub>2</sub>-reference reflections in red from COD 9009074) of 0.5 wt % FeF<sub>2</sub>-NPs in [BMIm][BF<sub>4</sub>]@TRGO-SH from Fe(AMD)<sub>2</sub>.

### CoF<sub>2</sub>@TRGO-SH

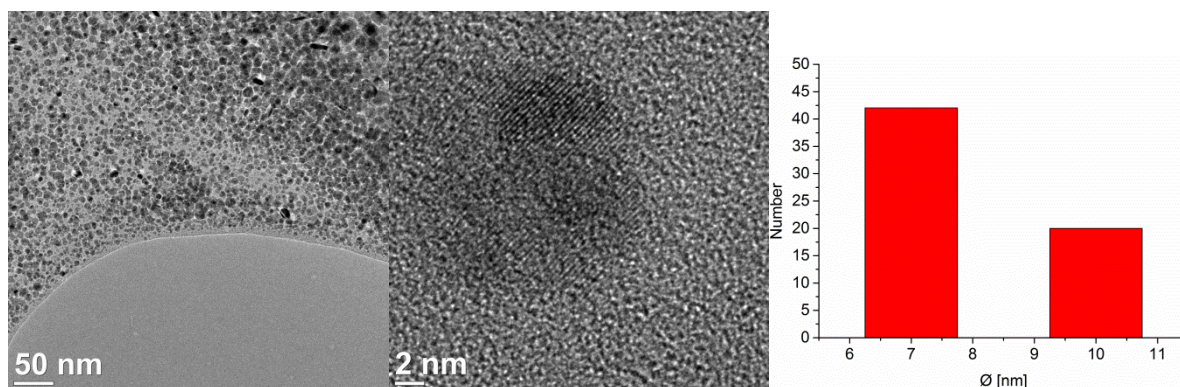



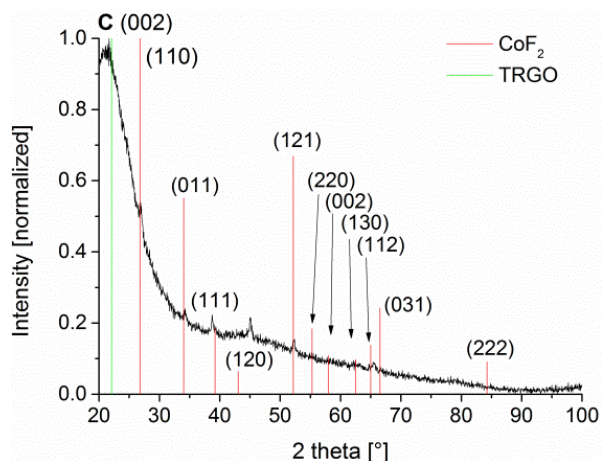

**Figure S17:** TEM and size distribution (top) PXRD (bottom, CoF<sub>2</sub>-reference reflections in red from COD 9009073), of 0.5 wt % CoF<sub>2</sub>-NPs in [BMIm][BF<sub>4</sub>]@TRGO-SH from Co(AMD)<sub>2</sub>.

### PrF<sub>3</sub>@TRGO-SH

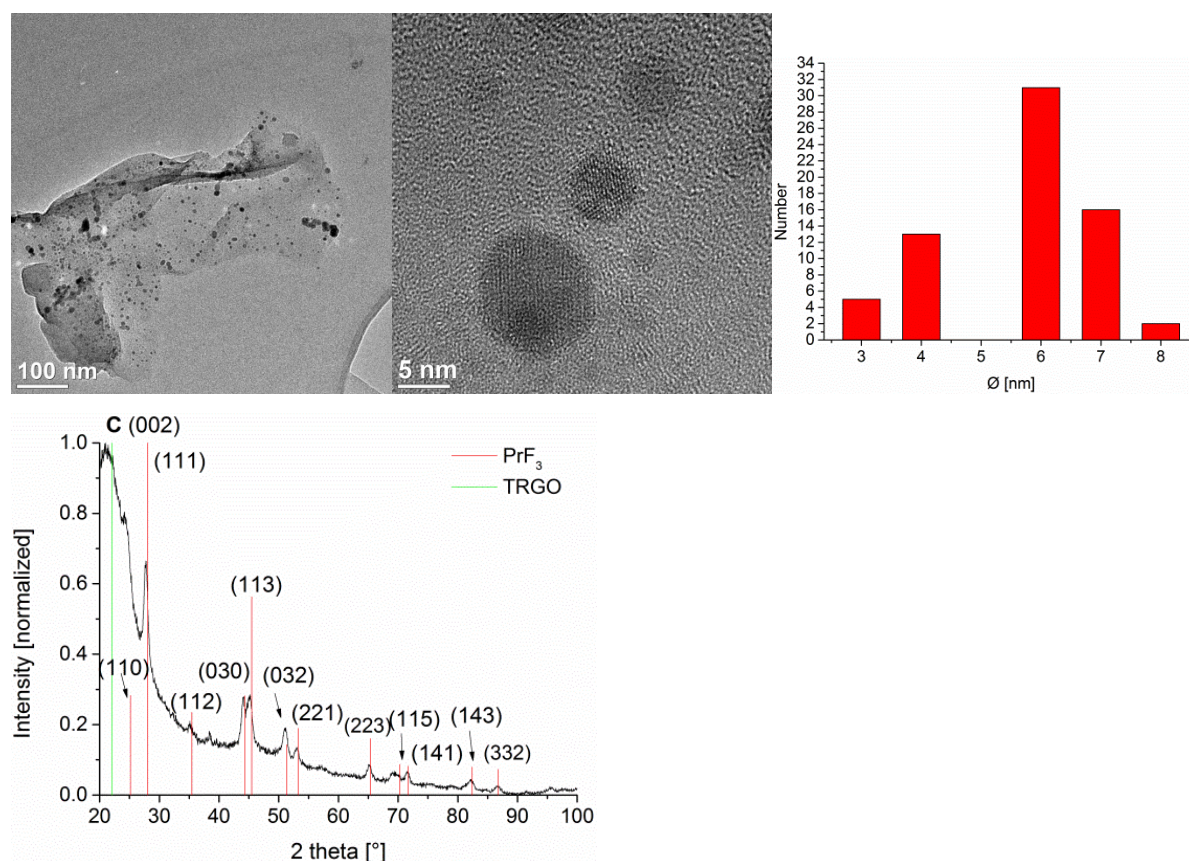

**Figure S18:** TEM and size distribution (top), PXRD and EDX (bottom, PrF<sub>3</sub>-reference reflections in red from COD 1010984), of 0.5 wt % PrF<sub>3</sub>-NPs in [BMIm][BF<sub>4</sub>]@TRGO-SH from Pr(AMD)<sub>3</sub>.

## EuF<sub>3</sub>@TRGO-SH

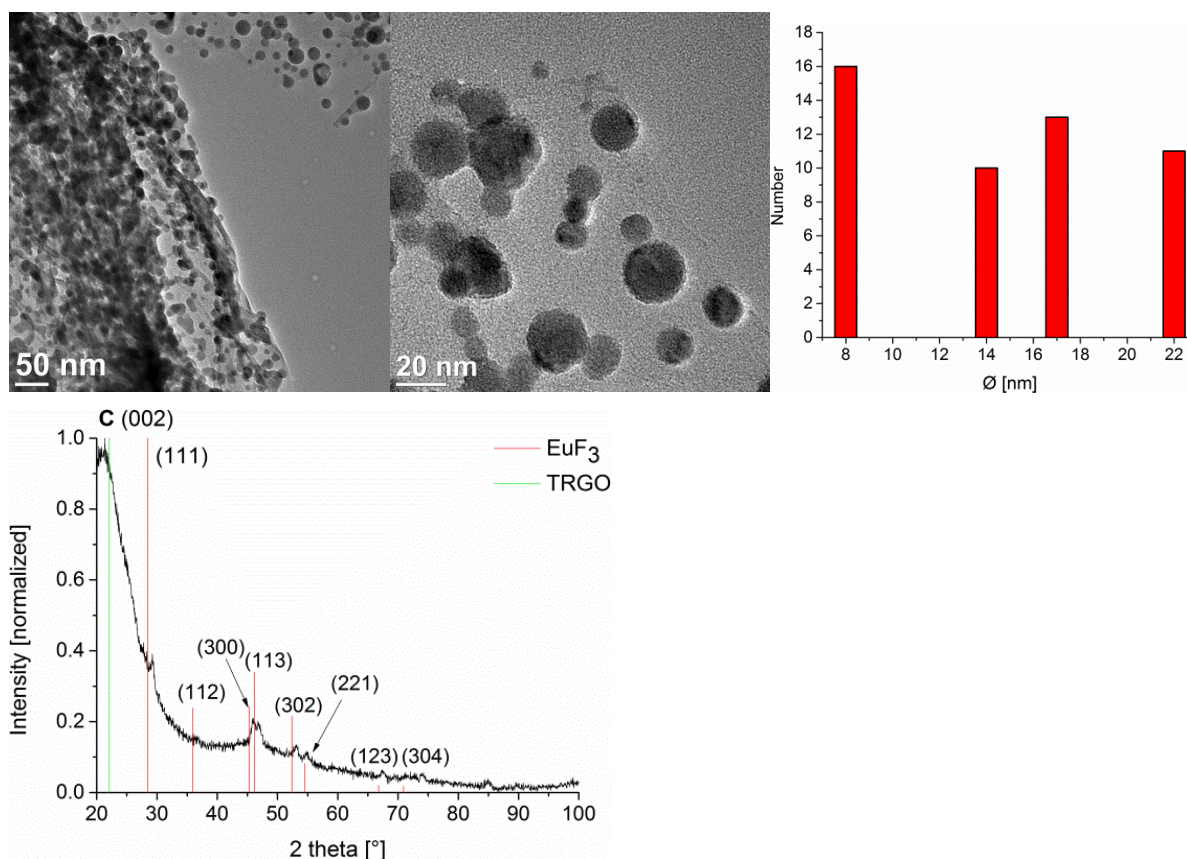

**Figure S19:** TEM and size distribution (top), PXRD and EDX (bottom, EuF<sub>3</sub>-reference reflections in red from ICDD 33-0373), of 0.5 wt % EuF<sub>3</sub>-NPs in [BMIm][BF<sub>4</sub>] @TRGO-SH from Eu(dpm)<sub>3</sub>.

## References

1. Marquardt D.; Vollmer C.; Thomann R.; Steurer P.; Mülhaupt R.; Redel E.; Janiak C. *Carbon*, **2011**, 49, 1326-1332.
2. Marquardt D.; Beckert F.; Pennetreau F.; Tölle F.; Mülhaupt R.; Riant O.; Hermans S.; Barthel J.; Janiak C. *Carbon*, **2014**, 66, 285-294.
3. Thermo Scientific XPS, <http://xpssimplified.com/periodictable.php>, (accessed December 2016).
4. Moulder J. F.; Stickle W. F.; Sobol P. E.; Bomben K. D. *Handbook of X-ray Photoelectron Spectroscopy*, Chastain J.; Perkin-Elmer Corporation, Minnesota, 1992.
